# THE AMERICAN JOURNAL OF PSYCHIATRY

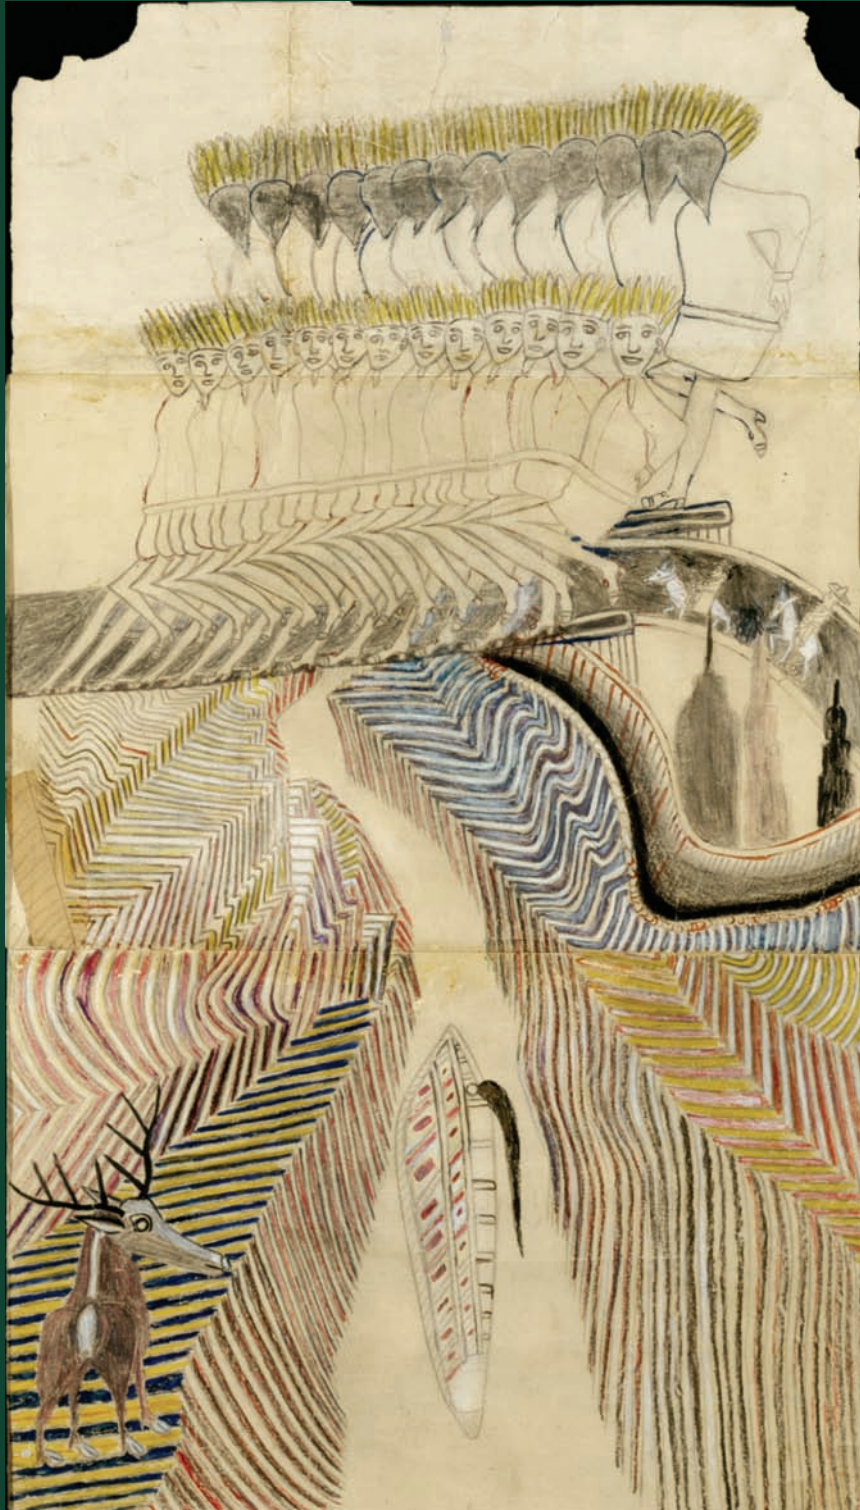

**Antenatal Depression:  
Navigating the Treatment Dilemmas**  
Marlene P. Freeman 1162

**A Longitudinal Study of the Use of  
Mental Health Services by Persons  
With Serious Mental Illness:  
Do Spanish-Speaking Latinos Differ  
From English-Speaking Latinos and  
Caucasians?**  
David P. Folsom et al. 1173

**Association of GRIK4 With Outcome  
of Antidepressant Treatment in the  
STAR\*D Cohort**  
Silvia Paddock et al. 1181

**Parental Diagnoses in Youth With  
Narrow Phenotype Bipolar Disorder or  
Severe Mood Dysregulation**  
Melissa A. Brotman et al. 1238

**Continuing Medical Education** 1298

**August 2007**

**Volume 164 • Number 8**

Official Journal of the  
AMERICAN PSYCHIATRIC ASSOCIATION

[ajp.psychiatryonline.org](http://ajp.psychiatryonline.org)
