# THE AMERICAN JOURNAL OF PSYCHIATRY

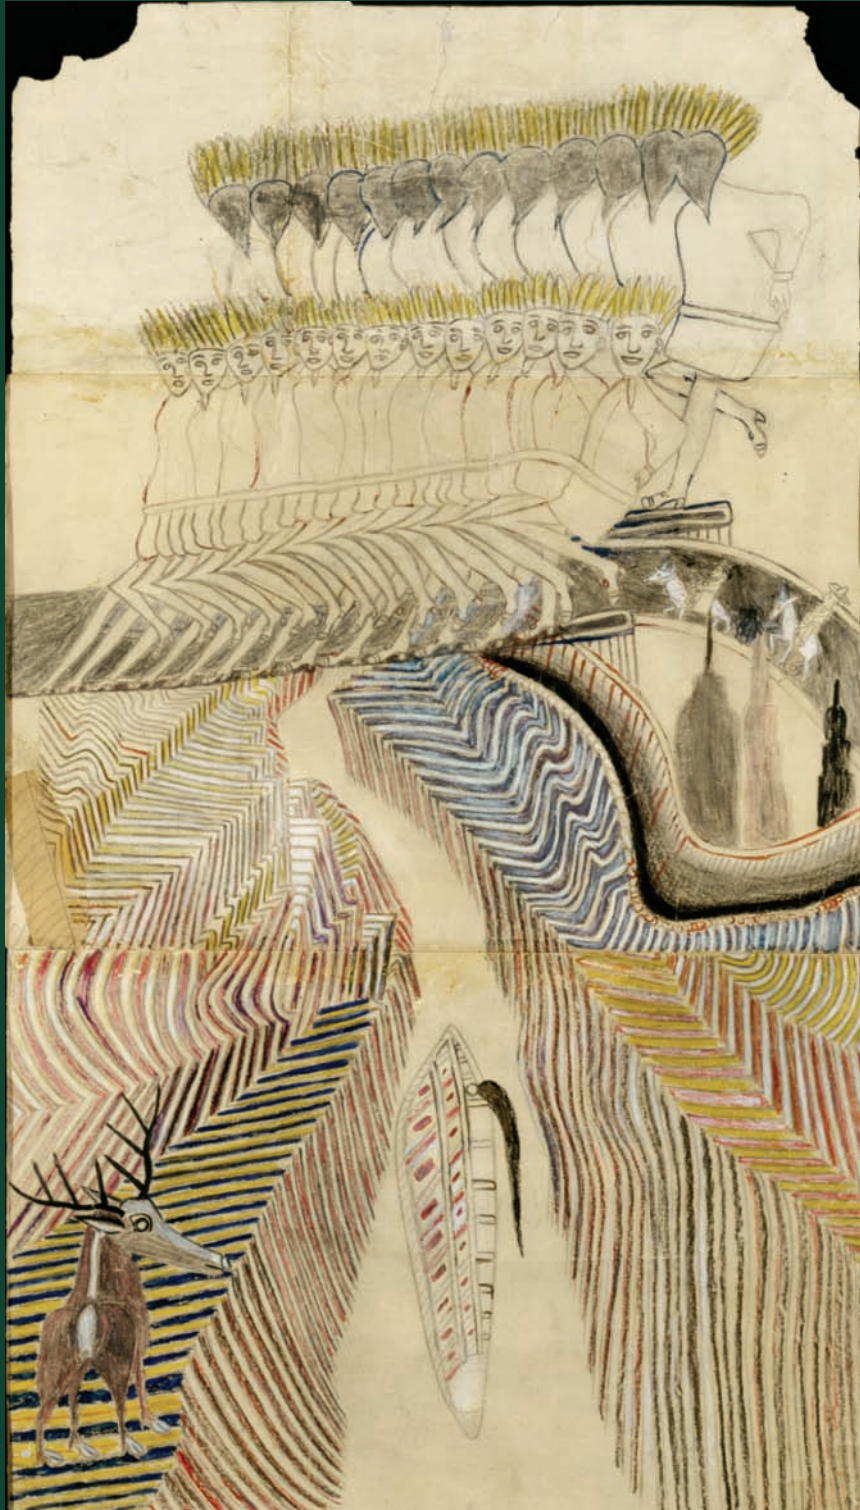

**Antenatal Depression:  
Navigating the Treatment Dilemmas**  
Marlene P. Freeman 1162

**A Longitudinal Study of the Use of  
Mental Health Services by Persons  
With Serious Mental Illness:  
Do Spanish-Speaking Latinos Differ  
From English-Speaking Latinos and  
Caucasians?**  
David P. Folsom et al. 1173

**Association of GRIK4 With Outcome  
of Antidepressant Treatment in the  
STAR\*D Cohort**  
Silvia Paddock et al. 1181

**Parental Diagnoses in Youth With  
Narrow Phenotype Bipolar Disorder or  
Severe Mood Dysregulation**  
Melissa A. Brotman et al. 1238

**Continuing Medical Education** 1298

**August 2007**

**Volume 164 • Number 8**

Official Journal of the  
AMERICAN PSYCHIATRIC ASSOCIATION

[ajp.psychiatryonline.org](http://ajp.psychiatryonline.org)

# THE AMERICAN JOURNAL OF PSYCHIATRY

Official Journal of the American Psychiatric Association

## Instructions for Activating Your Online Subscription

All subscribers to the print edition of *The American Journal of Psychiatry* are automatically eligible to view the *Journal* online. The online version of the *Journal* allows you to conduct searches for topics of interest in issues going all the way back to 1844. Plus the only way readers can participate in the *Journal's* new CME Course program is to have an activated online subscription (note: there is an additional annual fee to be enrolled and eligible to receive up to 36 hours of category 1 CME credit).

To activate your online subscription:

Make sure you have your customer identification number available. This number is printed on your *Journal* mailing label, directly above your name and address. If you cannot locate this number, please contact American Psychiatric Publishing, Inc., through one of the following methods:

- e-mail: [accessnumber@psych.org](mailto:accessnumber@psych.org)
- phone: (800) 368-5777
- fax: (703) 907-1091
- mail:

American Psychiatric Publishing, Inc.  
1000 Wilson Blvd., Suite 1825  
Arlington, VA 22209-3901  
Attn: Circulation Department.

Internet: <http://www.psychiatryonline.org>. Click on the "Subscriptions" button located near the bottom of the page. Then click on the appropriate link:

- ACTIVATE Your Member or Individual (Nonmember) Subscription

For APA Members, you will find your member number on the mailing label above your name. It is

a 10-digit number beginning with zeros. Enter your number in the box and click the SUBMIT button.

For Individual Nonmembers and Institutions, your customer number is on the mailing label above your name. It is a 10-digit number beginning with 22 or 30. Enter this number in the box and click the SUBMIT button.

Fill out all the information on the next screen and press the "Send Form" button at the bottom on the right.

When finished, click the "Done" button. You will receive an e-mail confirmation that your subscription has been activated.

**Continuing Medical Education:** You now have an opportunity to earn CME credits by reading articles in *The American Journal of Psychiatry*. Three articles in each issue will each comprise a short course for up to 1 hour category 1 CME credit each. The course comprises reading the article and answering three multiple-choice questions with a single correct answer. CME Credit is issued only online. Readers who want credit must subscribe to the AJP Continuing Medical Education Course program (APA Members: \$97.00 per year; Nonmember subscribers: \$144.00 per year; nonmember nonsubscribers: \$180.00 per year). Go to [cme.psychiatryonline.org](http://cme.psychiatryonline.org), select *The American Journal of Psychiatry* at that site, take the course(s) of your choosing, complete the evaluation form, and submit your answers for CME credit. In the online course, correct answers will be highlighted for your reference; there is no minimum threshold score necessary for the credit. A link from the question to the correct answer in context will be highlighted in the associated article. A certificate for each course will be generated upon successful completion.

The American Journal of Psychiatry is online at [ajp.psychiatryonline.org](http://ajp.psychiatryonline.org)

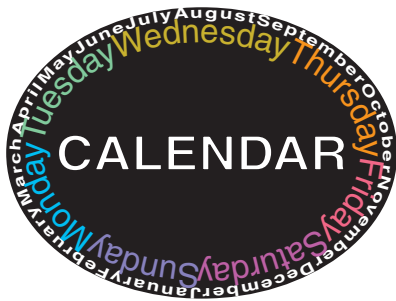

For free listing of your organization's official annual or regional meeting, please send us the following information: sponsor, location, inclusive dates, type and number of continuing education credits (if available), and the name, address, and telephone number of the person or group to contact for more information. In order for an event to appear in our listing, all notices and changes must be received at least 6 months in advance of the meeting and should be addressed to:

*Calendar, American Journal of Psychiatry, 1000 Wilson Boulevard, Suite 1825, Arlington, VA 22209-3901, jblair@psych.org (e-mail).*

*Because of space limitations, only listings of meetings of the greatest interest to Journal readers will be included.*

## AUGUST

**August 25–29**, 13th International Congress of the European Society of Child and Adolescent Psychiatry, Florence, Italy. Contact: Escap Secretariat, Via Emilia Est, 421, Modena, Italy 41100; 39 059 4223052 (tel), 39 059 4222275 (fax), info@escap-net.org (e-mail), <http://www.escap-net.org> (web site).

## SEPTEMBER

**September 9–12**, Annual meeting of the Society for the Study of Psychiatry and Culture (SSPC), (in cooperation with the World Psychiatric Association Transcultural Psychiatry Section and the World Association for Cultural Psychiatry), Stockholm, Sweden. Contact: Jim Boehnlein or Shannon Squire [sspcadmin@gmail.com](mailto:sspcadmin@gmail.com) (e-mail), [www.psychiatryandculture.org](http://www.psychiatryandculture.org) (web site).

## OCTOBER

**October 6–7**, 6th NYU Reproductive Psychiatry Conference, New York. Contact: Dr. Shari I. Lusskin, Director of Reproductive Psychiatry, New York University School of Medicine, 155 East 29th Street, Suite 26J, New York, NY 10016; (212) 263-5295 (tel), [www.med.nyu.edu/cme](http://www.med.nyu.edu/cme) (web site).

**October 7–11**, 15th World Congress on Psychiatric Genetics, New York. Contact: Lynn E DeLisi, International Society of Psychiatric Genetics, NYU School of Medicine, 650 First Avenue, 5th Floor Room 543, New York, NY 10016; (212) 263-3420 (tel), (212) 263-3407 (fax), [DeLisi76@AOL.com](mailto:DeLisi76@AOL.com) (e-mail), [www.WCPG2007.com](http://www.WCPG2007.com) (web site).

**October 11–14**, 59th Institute on Psychiatric Services, American Psychiatric Association, New Orleans, LA. Contact: Jill Gruber, APA Annual Meetings Dept., 1000 Wilson Blvd., Ste. 1825, Arlington, VA 22209; (703) 907-7815.

**October 23–28**, 54th Annual Meeting of the American Academy of Child and Adolescent Psychiatry, Boston. Contact: AACAP, 3615 Wisconsin Avenue, N.W., Washington, DC 20016-3007; (202) 966-7300 (tel), (202) 966-2891 (fax), [meetings@aacap.org](mailto:meetings@aacap.org) (e-mail), [www.aacap.org](http://www.aacap.org) (web site).

## DECEMBER

**December 8**, 4th annual Child Mental Health Symposium, Tucson, AZ. Contact: Professional Development Office, University of Arizona College of Medicine, Department of Psychiatry, PO Box 245002, 1501 N. Campbell Ave. #7423, Tucson, AZ 85724-5002; (520) 626-1392 (tel), (520) 626-5732 (fax), [uapsycon@email.arizona.edu](mailto:uapsycon@email.arizona.edu) (e-mail), [www.psychiatry.arizona.edu](http://www.psychiatry.arizona.edu) (web site).

## FEBRUARY 2008

**February 15–18**, 21st Annual Meeting of the American Association for Geriatric Psychiatry, Washington, DC. Contact: AAGP, 7910 Woodmont Ave., Ste. 1050, Bethesda, MD 20814-3004; (301) 654-7850 (tel), (301) 654-4137 (fax), [www.aagpmeeting.org](http://www.aagpmeeting.org) (web site).

**February 27–March 2**, Annual meeting of the American College of Psychiatrists, Kauai, Hawaii. Contact: American College of Psychiatrists, 122 S. Michigan Ave., Ste. 1360, Chicago, IL 60603; (312) 662-1020 (tel), (312) 662-1025 (fax), [maureen@acpsych.org](mailto:maureen@acpsych.org) (e-mail).

## MARCH

**March 14–17**, 21st Annual Meeting of the American Association for Geriatric Psychiatry, Orlando. Contact: AAGP, 7910 Woodmont Ave., Ste. 1050, Bethesda, MD 20814-3004; (301) 654-7850 (tel), (301) 654-4137 (fax), [www.aagpmeeting.org](http://www.aagpmeeting.org) (web site).

**March 15**, 7th Annual Women's Mental Health Symposium, Tucson, AZ. Contact: Professional Development Office, University of Arizona College of Medicine, Department of Psychiatry, PO Box 245002, 1501 N. Campbell Ave. #7423, Tucson, AZ 85724-5002; (520) 626-1392 (tel), (520) 626-5732 (fax), [uapsycon@email.arizona.edu](mailto:uapsycon@email.arizona.edu) (e-mail), [www.psychiatry.arizona.edu](http://www.psychiatry.arizona.edu) (web site).

**March 26–29**, Annual Meeting and Scientific Sessions of the Society of Behavioral Medicine, San Diego. Contact: Society of Behavioral Medicine, 17000 Commerce Parkway, Ste. C, Mount Laurel, NJ 08054; (856) 439-1297 (tel), (856) 439-0525 (fax), [info@sbm.org](mailto:info@sbm.org) (e-mail).

## MAY

**May 1–4**, The 52nd Annual Meeting of the American Academy of Psychoanalysis and Dynamic Psychiatry, Washington, DC. Contact: Executive Office, American Academy of Psychoanalysis and Dynamic Psychiatry, P. O. Box 30, Bloomfield, CT 06002; (888) 691-8281 (tel), (888) 286-0787 (fax), [aap@ssmgt.com](mailto:aap@ssmgt.com) (e-mail).

**May 3–4**, American Academy of Psychiatry and the Law Semiannual Meeting, Washington, D.C. Contact: One Regency Drive, PO Box 30, Bloomfield, CT 06002-0030; (800) 331-1389, (tel) (860) 286-0787 (fax), [execoff@aapl.org](mailto:execoff@aapl.org) (e-mail).

**May 3–8**, 161st Annual Meeting of the American Psychiatric Association, Washington, DC. Contact: Cathy Nash, APA Annual Meetings Dept., 1000 Wilson Blvd., Ste. 1825, Arlington, VA 22209; (703) 907-7822.

**May 29–31**, International Congress of Dual Pathology 2008, Madrid. Contact: Technical Secretariat, Tílesa OPC, Londres, 17 - 28028, Madrid, Spain; (34) 91 361 12600 (tel), (34) 91 355

*Continued on page A24*

# Psychological Medicine

Volume 37 Number 7 July 2007

## CONTENTS

|                                                                                                                                                                                       |     |                                                                                                                                                               |      |
|---------------------------------------------------------------------------------------------------------------------------------------------------------------------------------------|-----|---------------------------------------------------------------------------------------------------------------------------------------------------------------|------|
| <b>In this Issue</b>                                                                                                                                                                  | 911 | <b>Comparison of diagnostic models for personality disorders</b>                                                                                              | 983  |
| <b>COMMENTARY</b>                                                                                                                                                                     |     | MOREY, L.C., HOPWOOD, C.J., GUNDERSON, J.G., SKODOL, A.E., SHEA, M.T., YEN, S., STOUT, R.L., ZANARINI, M.C., GRILO, C.M., SANISLOW, C.A., AND MCGLASHAN, T.H. |      |
| <b>Cannabis use and symptom experience amongst people with mental illness: a commentary on Degendhardt <i>et al.</i></b>                                                              | 913 | <b>Experimental manipulation of cognitive control processes causes an increase in communication disturbances in healthy volunteers</b>                        | 995  |
| MACLEOD, J.                                                                                                                                                                           |     | KERNS, J.G.                                                                                                                                                   |      |
| <b>REVIEW ARTICLE</b>                                                                                                                                                                 |     | <b>Can the 12-item General Health Questionnaire be used to measure positive mental health?</b>                                                                | 1005 |
| <b>Participant distress in psychiatric research: a systematic review</b>                                                                                                              | 917 | HU, Y., STEWART-BROWN, S., TWIGG, L., AND WEICH, S.                                                                                                           |      |
| JORM, A.F., KELLY, C.M., AND MORGAN, A.J.                                                                                                                                             |     | <b>Assessment of complex mental activity across the lifespan: development of the Lifetime of Experiences Questionnaire (LEQ)</b>                              | 1015 |
| <b>ORIGINAL ARTICLES</b>                                                                                                                                                              |     | VALENZUELA, M.J., AND SACHDEV, P.                                                                                                                             |      |
| <b>The temporal dynamics of relationships between cannabis, psychosis and depression among young adults with psychotic disorders: findings from a 10-month prospective study</b>      | 927 | <b>The psychological costs of unsustainable housing commitments</b>                                                                                           | 1027 |
| DEGENHARDT, L., TENNANT, C., GILMOUR, S., SCHOFIELD, D., NASH, L., HALL, W., AND MCKAY, D.                                                                                            |     | TAYLOR, M.P., PEVALIN, D.J., AND TODD, J.                                                                                                                     |      |
| <b>Testing the self-medication hypothesis of depression and aggression in cannabis-dependent subjects</b>                                                                             | 935 | <b>Income-related inequality in mental health in Britain: the concentration index approach</b>                                                                | 1037 |
| ARENDE, M., ROSENBERG, R., FJORDBACK, L., BRANDHOLDT, J., FOLDAGER, L., SHER, L., AND MUNK-JØRGENSEN, P.                                                                              |     | MANGALORE, R., KNAPP, M., AND JENKINS, R.                                                                                                                     |      |
| <b>Longitudinal modeling of genetic and environmental influences on self-reported availability of psychoactive substances: alcohol, cigarettes, marijuana, cocaine and stimulants</b> | 947 | <b>The epidemiology of DSM-IV specific phobia in the USA: results from the National Epidemiologic Survey of Alcohol and Related Conditions</b>                | 1047 |
| GILLESPIE, N.A., KENDLER, K.S., PRESCOTT, C.A., AGGEN, S.H., GARDNER JR., C.O., JACOBSON, K., AND NEALE, M.C.                                                                         |     | STINSON, F.S., DAWSON, D.A., CHOU, S.P., SMITH, S., GOLDSTEIN, R.B., RUAN, W.J., AND GRANT, B.F.                                                              |      |
| <b>State affective instability in borderline personality disorder assessed by ambulatory monitoring</b>                                                                               | 961 | <b>BOOK REVIEWS</b>                                                                                                                                           |      |
| EBNER-PRIMER, U.W., KUO, J., KLEINDIENST, N., WELCH, S.S., REISCH, T., REINHARD, I., LIEB, K., LINEHAN, M.M., AND BOHUS, M.                                                           |     | <i>Genes, Environment, and Psychopathology: Understanding the Causes of Psychiatric and Substance Use Disorders</i>                                           | 1061 |
| <b>Enhanced emotion—induced amnesia in borderline personality disorder</b>                                                                                                            | 971 | VAN DEN BREE, M.B.M.                                                                                                                                          |      |
| HURLEMANN, R., HAWELLEK, B., MAIER, W., AND DOLAN, R.J.                                                                                                                               |     | <i>Depression and Brain Dysfunction</i>                                                                                                                       | 1061 |
|                                                                                                                                                                                       |     | MANES, F., AND CETKOVITCH-BAKMAS, M.                                                                                                                          |      |
|                                                                                                                                                                                       |     | <b>Correspondence</b>                                                                                                                                         | 1064 |
|                                                                                                                                                                                       |     | <i>American Journal of Psychiatry Contents March 2007</i>                                                                                                     | 1069 |

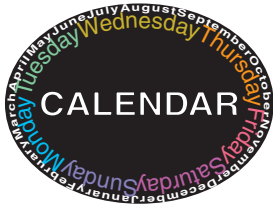

Continued from page A8

9208, secretariat@cipd2008.com (e-mail), www.cipd2008.com (web site).

## JUNE

**June 19–21**, Thematic Conference on Depression and Relevant Psychiatric Condition in Primary Care, Granada, Spain. Contact: Francisco Torres-González, Andalusian Research Group on Mental Health, University of Granada, Avenida de Madrid 11, Granada 18071, Spain; (34) 958-272651 (tel), (34) 958-275214 (fax), ftorres@ugr.es (e-mail).

## OCTOBER

**October 2–5**, 60th Institute on Psychiatric Services, American Psychiatric Association, Chicago, IL. Contact: Jill Gruber, APA Annual Meetings Dept., 1000 Wilson Blvd., Ste. 1825, Arlington, VA 22209; (703) 907-7815.

**October 28–November 2**, 55th Annual Meeting of the American Academy of Child and Adolescent Psychiatry, Chicago. Contact: AACAP, 3615 Wisconsin Avenue, N.W., Washington, DC 20016-3007; (202) 966-7300 (tel), (202) 966-2891 (fax), meetings@aacap.org (e-mail), www.aacap.org (web site).

## NOVEMBER

**November 23–28**, Canadian Psychiatric Association 58th Annual Meeting, Vancouver, British Columbia, Canada. Contact: 260-441 MacLaren Street, Ottawa, ON K2P 2H3, Canada; (800) 267-

1555 (tel), (613) 234-9857 (fax), cpa@medical.org (e-mail).

## FEBRUARY 2009

**February 25–March 1**, American College of Psychiatrists Annual Meeting, Tucson, AZ. Contact: 122 South Michigan Avenue, Suite 1360, Chicago, IL 60603; (312) 662-1020 (tel), (312) 662-1025 (fax), angel@ACPsych.org (e-mail).

## MAY

**May 16–21**, 162nd Annual Meeting of the American Psychiatric Association, San Francisco. Contact: Cathy Nash, APA Annual Meetings Dept., 1000 Wilson Blvd., Ste. 1825, Arlington, VA 22209; (703) 907-7822.

## Coming in the September 2007 issue

### THE AMERICAN JOURNAL OF PSYCHIATRY

#### *Intensive Psychosocial Intervention Enhances Functioning in Patients With Bipolar Depression: Results From a 9-Month Randomized Controlled Trial*

D.J. Miklowitz, M. Otto, E. Frank, N. Reilly-Harrington, J. Kogan, G. Sachs, M. Thase, J. Calabrese, L. Marangell, M. Ostacher, J. Patel, M. Thomas, M. Araga, J. Gonzalez, and S. Wisniewski

#### *Adjunctive Antidepressant Use and Symptomatic Recovery Among Bipolar Depressed Patients With Concomitant Manic Symptoms: Findings From the STEP-BD*

J. Goldberg, R. Perlis, S. Nassir Ghaemi, J. Calabrese, C. Bowden, S. Wisniewski, D.J. Miklowitz, G. Sachs, and M. Thase

#### *Early Evidence on the Effects of Regulators' Suicidality Warnings on SSRI Prescriptions and Suicide in Children and Adolescents*

R. Gibbons, H. Brown, K. Hur, S. Marcus, D. Bhaumik, J. Erkens, R. Herings, and J.J. Mann

#### *Familial Pathways to Early-Onset Suicidal Behavior: Familial and Individual Antecedents of Suicidal Behavior*

N. Melhem, D. Brent, M. Ziegler, S. Iyengar, D. Kolko, M. Oquendo, B. Birmaher, A. Burke, J. Zelazny, B. Stanley, and J.J. Mann

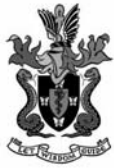

# THE BRITISH JOURNAL OF PSYCHIATRY

July 2007, VOL. 191

<http://bjp.rcpsych.org>

- A1 Editorial Board
- A2 Highlights of this issue
- A3 Psychiatry in pictures

## EDITORIALS

- 1 **Patient choice in psychiatry**  
C. Samele, S. Lawton-Smith, L. Warner,  
and J. Mariathasan
- 3 **Asylum claims and memory of trauma:  
sharing our knowledge**  
J. Herlihy and S.W. Turner

## REVIEW ARTICLE

- 5 **Theory of mind in schizophrenia. Meta-  
analysis**  
M. Sprong, P. Schothorst, E. Vos, J. Hox,  
and H. van Engeland

## PAPERS

- 14 **Cost-effectiveness of first- v. second-  
generation antipsychotic drugs: results  
from a randomised controlled trial in  
schizophrenia responding poorly to  
previous therapy**  
L.M. Davies, S. Lewis, P.B. Jones, T.R.E. Barnes,  
F. Gaughran, K. Hayhurst, A. Markwick, and H. Lloyd  
on behalf of the CUTLASS team
- 23 **Metabolic disease and cardiovascular risk in  
people treated with antipsychotics in the  
community**  
P. Mackin, D. Bishop, H. Watkinson, P. Gallagher,  
and I.N. Ferrier
- 30 **Rates and correlates of employment in  
people with schizophrenia in the UK, France  
and Germany**  
S. Marwaha, S. Johnson, P. Bebbington, M. Stafford,  
M.C. Angermeyer, T. Brugha, J.-M. Azorin, R. Kilian,  
K. Hansen, and M. Toumi
- 38 **Determining when impairment constitutes  
incapacity for informed consent in  
schizophrenia research**  
S.Y.H. Kim, P.S. Appelbaum, J. Swan, T.S. Stroup,  
J.P. McEvoy, D.C. Goff, D.V. Jeste, J.S. Lamberti,  
A. Leibovici, and E.D. Caine

- 44 **Young people who self-harm**  
R. Young, M. van Beinum, H. Sweeting, and P. West
- 50 **The Depression Scale as a screening  
instrument for a subsequent depressive  
episode in primary healthcare patients**  
O. Poutanen, A.-M. Koivisto, M. Joukamaa,  
A. Mattila, and R.K.R. Salokangas
- 55 **Heroin-assisted treatment for opioid  
dependence. Randomised controlled trial**  
C. Haasen, U. Verthein, P. Degkwitz, J. Berger,  
M. Krausz, and D. Naber
- 63 **Brain opioid receptor binding in early  
abstinence from opioid dependence.  
Positron emission tomography study**  
T.M. Williams, M.R.C. Daglish, A. Lingford-Hughes,  
L.G. Taylor, A. Hammers, D.J. Brooks, P. Grasby,  
J.S. Myles, and D.J. Nutt
- 70 **Long-term outcomes after discharge from  
medium secure care: a cause for concern**  
S. Davies, M. Clarke, C. Hollin, and C. Duggan
- 75 **Impact of sexual violence on disclosure  
during Home Office interviews**  
D. Bögner, J. Herlihy, and C.R. Brewin

## SHORT REPORTS

- 82 **Influence of drug company authorship and  
sponsorship on drug trial outcomes**  
T. Tungaraza and R. Poole
- 84 **Depressive symptoms during pregnancy and  
low birth weight at term. Longitudinal study**  
J. Evans, J. Heron, R.R. Patel, and N. Wiles

## COLUMNS

- 86 Correspondence
- 87 One hundred years ago
- 88 Book reviews
- 90 Instructions for authors
- 94 Contents of the *American Journal of Psychiatry*
- 95 Contents of *Advances in Psychiatric Treatment*
- 96 From the Editor's desk
